# Supplementary material for: Integrating eDNA and citizen science observations to model distribution of a temperate freshwater turtle near its northern range limit
Source: PeerJ journal article supplement (doi:10.7717/peerj.15120), 2023-03-23
Supplement: Supplemental_tables.pdf [file Supplemental_tables.pdf]

**Table S1. Cytochrome b sequences (sense strand) of species-specific common musk turtle (*Sternotherus odoratus*) primer and probe set compared to other co-occurring turtles in the area.**

Mismatches between *S. odoratus* and other species are highlighted.

| Species                   | Region  | Sequence (5' – 3')                                                               | Mismatches |
|---------------------------|---------|----------------------------------------------------------------------------------|------------|
| <u>Common musk turtle</u> |         | <u>CGGCTGACTCATTCGAAACC</u>                                                      | -          |
| Blanding's turtle         | Forward | CGG <b>A</b> TGACT <b>T</b> AT <b>C</b> CG <b>T</b> AAC <b>A</b>                 | 5          |
| Northern map turtle       | Primer  | CGG <b>A</b> TGACT <b>T</b> AT <b>C</b> CG <b>T</b> AA <b>T</b> A                | 6          |
| Midland painted turtle    | (1-20)  | CGG <b>A</b> TGACTCAT <b>C</b> CG <b>T</b> AA <b>T</b> A                         | 5          |
| Common snapping turtle    |         | CGG <b>A</b> TGACT <b>A</b> AT <b>C</b> CG <b>C</b> AAC <b>A</b>                 | 5          |
| <u>Common musk turtle</u> |         | <u>CCATGCCAACGGC</u>                                                             | -          |
| Blanding's turtle         | TaqMan  | <b>A</b> CATGCCAACGGC                                                            | 1          |
| Northern map turtle       | MGB     | <b>T</b> CATGC <b>T</b> AACGGC                                                   | 2          |
| Midland painted turtle    | Probe   | <b>A</b> CATGC <b>T</b> AACGGC                                                   | 2          |
| Common snapping turtle    | (22-34) | <b>A</b> C <b>A</b> C <b>C</b> GCCAACGGC                                         | 2          |
| <u>Common musk turtle</u> |         | <u>ATGCACATTGGACGAGGAATC</u>                                                     | -          |
| Blanding's turtle         | Reverse | <b>C</b> <b>T</b> <b>C</b> CACATTGG <b>C</b> CG <b>G</b> GGACT <b>T</b>          | 6          |
| Northern map turtle       | Primer  | <b>C</b> <b>T</b> <b>T</b> CA <b>T</b> ATTGGACGAGGAAT <b>T</b>                   | 4          |
| Midland painted turtle    | (62-82) | <b>C</b> <b>T</b> <b>T</b> CA <b>T</b> ATTGGACGAGGAAT <b>T</b>                   | 4          |
| Common snapping turtle    |         | <b>C</b> <b>T</b> <b>C</b> CA <b>T</b> AT <b>C</b> GG <b>C</b> CGAGGACT <b>T</b> | 7          |

**Table S2. Environmental layers for MaxEnt modelling.**

Raw resolution, timespan of data collection, processing method, and biological and ecological implications for the focal species, Common musk turtle (*Sternotherus odoratus*) are show. Data sources: WorldClim2.0 ([www.worldclim.org](http://www.worldclim.org)); National Oceanic and Atmospheric Administration (NOAA, [www.noahrs.noaa.gov](http://www.noahrs.noaa.gov)); Natural Resources Canada (NRC, [www.nrcan.gc.ca](http://www.nrcan.gc.ca));

| Name                                                                          | Source                            | Resolution     | Timespan  | Processing method                                                                                     | Note                                                                                                                                                              |
|-------------------------------------------------------------------------------|-----------------------------------|----------------|-----------|-------------------------------------------------------------------------------------------------------|-------------------------------------------------------------------------------------------------------------------------------------------------------------------|
| Bioclimatic variables<br>Solar radiation                                      | WorldClim2.0                      | 30 arcsec      | 1970-2000 | Solar radiation summed from May to Sep. All resampled to 1 km                                         | Regularly used in SDMs (Fick & Hijmans 2017)                                                                                                                      |
| Annual snow                                                                   | NOAA snow cover                   | 100 m          | 2014-2020 | Days of snow/ice cover summed for each year, then resampled to 1 km                                   | May correlate with overwintering duration                                                                                                                         |
| Mean elevation<br>Elevation range<br>Elevation STD                            | NRC Digital Elevation Model (DEM) | 0.75 arcsecond | 2013      | Mean, range, and standard deviation of elevation calculated to each 1km grid cell                     | May affect dispersal of <i>S. odoratus</i> and habitat connectivity. e.g., higher, or rougher terrain might hinder its range expansion                            |
| Forest<br>Farmland<br>Shrub & grass<br>Urban & barren<br>Waterbody<br>Wetland | NRC Landcover                     | 30 m           | 2015      | Area proportion of each respective landscape type calculated to each 1km grid cell                    | Various landscape types that might affect habitat suitability and connectivity, e.g., waterbodies and wetlands could be crucial for dispersal and summer foraging |
| Total shoreline<br>Wetland shoreline                                          | NRC National Hydro Network        | Vector         | 2010      | Vector lines rasterized to 20 m, then calculated total area and its proportion to each 1 km grid cell | Transition zones between aquatic and terrestrial environs also provide foraging and basking grounds                                                               |
| Moving average of landcover and shoreline layers                              | Landcover & shorelines            | -              | -         | Moving average of surrounding cells within a 5 km radius, i.e., 25 cells in 5 km × 5 km area          | Generalization of the neighboring situations of the corresponding landscapes                                                                                      |



**Table S4. MaxEnt parameter combination ranking under 1% backward selection criterion for the modelling scenarios.**

The top 3 parameter combinations are shown for each scenario, with the best indicated by smallest AICc ( $\Delta_{AICc} = 0$ , bolded). Parameters are presented in the format of feature class combinations followed by regularization multiplier value, e.g., LQPT3.0 indicates that *Linear*, *Quadratic*, *Product*, and *Threshold* feature classes were used by MaxEnt algorithm, and the multiplier was set to 3.0. Number of variables, training AUC, testing AUC, and the difference between the two AUC values are also presented. Note the testing AUC values were averaged from 10-fold cross validation models, with standard deviation presented in brackets.

| Scenario                         | Parameters     | Variables | Training AUC | Testing AUC          | AUC difference | Delta AICc |
|----------------------------------|----------------|-----------|--------------|----------------------|----------------|------------|
| Rideau<br>+<br>NHIC-only         | <b>LQ1.0</b>   | <b>8</b>  | <b>0.941</b> | <b>0.940 (0.014)</b> | <b>0.002</b>   | <b>0</b>   |
|                                  | LQPT4.0        | 10        | 0.950        | 0.944 (0.013)        | 0.007          | 0.818      |
|                                  | LQPT3.5        | 9         | 0.951        | 0.944 (0.013)        | 0.007          | 2.667      |
| Rideau<br>+<br>NHIC-<br>eDNA     | <b>LQP4.5</b>  | <b>13</b> | <b>0.934</b> | <b>0.931 (0.015)</b> | <b>0.003</b>   | <b>0</b>   |
|                                  | LQP3.5         | 16        | 0.935        | 0.931 (0.015)        | 0.004          | 5.526      |
|                                  | LQP2.0         | 14        | 0.936        | 0.932 (0.015)        | 0.005          | 7.547      |
| S. Ontario<br>+<br>NHIC-only     | <b>LQPT3.0</b> | <b>10</b> | <b>0.970</b> | <b>0.966 (0.008)</b> | <b>0.004</b>   | <b>0</b>   |
|                                  | LQPT4.0        | 9         | 0.969        | 0.965 (0.008)        | 0.004          | 8.161      |
|                                  | LQPT4.5        | 10        | 0.969        | 0.966 (0.007)        | 0.003          | 13.609     |
| S. Ontario<br>+<br>NHIC-<br>eDNA | <b>LQPT3.5</b> | <b>11</b> | <b>0.968</b> | <b>0.963 (0.007)</b> | <b>0.004</b>   | <b>0</b>   |
|                                  | LQPT4.5        | 12        | 0.967        | 0.963 (0.007)        | 0.004          | 13.640     |
|                                  | LQPT3.0        | 11        | 0.968        | 0.963 (0.007)        | 0.004          | 14.926     |

**Table S5. Variable contributions to optimized MaxEnt models under 1% backward selection criterion for the modelling scenarios.**

Simplified response curves are also shown (relative occurrence rate on y axis and environmental gradient on x axis). Abbreviations: Contr.: contribution to model in percentage; M.: month; Precp.: precipitation; Q.: quarter; T.: temperature.

|                         |                     | Occurrence: NHIC-only |                                                                                     | Occurrence: NHIC-eDNA |                  |                                                                                       |                                                                                       |
|-------------------------|---------------------|-----------------------|-------------------------------------------------------------------------------------|-----------------------|------------------|---------------------------------------------------------------------------------------|---------------------------------------------------------------------------------------|
|                         | Variable            | Contr.                | Response curve                                                                      | Variable              | Contr.           | Response curve                                                                        |                                                                                       |
| <b>Rideau</b>           | Annual mean T.      | 38.4                  |    | Annual mean T.        | 22.2             |    |                                                                                       |
|                         | Total shoreline     | 27.1                  |    | Total shoreline       | 12.6             |    |                                                                                       |
|                         | Waterbody%          | 13.8                  |    | Waterbody%            | 12.1             |    |                                                                                       |
|                         | Mean elevation      | 12.5                  |    | Forest%               | 11.4             |    |                                                                                       |
|                         | Precp. coldest Q.   | 2.8                   |    | Mean diurnal range    | 8.5              |    |                                                                                       |
|                         | Farmland%           | 2.3                   |    | Mean elevation        | 7.2              |    |                                                                                       |
|                         | Mean T. wettest Q.  | 1.7                   |    | Precp. wettest M.     | 6.6              |    |                                                                                       |
|                         | Grassland% 5km      | 1.4                   |    | Min T. coldest M.     | 5.0              |    |                                                                                       |
|                         |                     |                       |                                                                                     |                       | Farmland%        | 3.4                                                                                   |   |
|                         |                     |                       |                                                                                     |                       | Precp. driest M. | 3.2                                                                                   |  |
|                         |                     |                       |                                                                                     | Urban&Barren%         | 3.2              |  |                                                                                       |
|                         |                     |                       |                                                                                     | Mean T. wettest Q.    | 2.7              |  |                                                                                       |
|                         |                     |                       |                                                                                     | Forest % 5km          | 1.8              |  |                                                                                       |
| <b>Southern Ontario</b> | Total shoreline     | 20.9                  |  | Total shoreline       | 20.4             |  |                                                                                       |
|                         | Mean T. warmest Q.  | 18.8                  |  | Mean T. warmest Q.    | 20.1             |  |                                                                                       |
|                         | Mean elevation      | 13.1                  |  | Mean elevation        | 12.6             |  |                                                                                       |
|                         | Annual mean T.      | 12.7                  |  | Annual mean T.        | 12.2             |  |                                                                                       |
|                         | Precp. warmest Q.   | 11.1                  |  | Precp. warmest Q.     | 10.9             |  |                                                                                       |
|                         | Waterbody%          | 10.3                  |  | Waterbody%            | 9.9              |  |                                                                                       |
|                         | Total shoreline 5km | 6.0                   |  | Total shoreline 5km   | 5.8              |  |                                                                                       |
|                         | Grass&Shrub% 5km    | 3.8                   |  | Grass&Shrub% 5km      | 3.3              |  |                                                                                       |
|                         | Forest% 5km         | 1.9                   |  | Farmland%             | 1.8              |  |                                                                                       |
|                         | Annual range T.     | 1.4                   |  | Forest% 5km           | 1.7              |  |                                                                                       |
|                         |                     |                       |                                                                                     | Annual range T.       | 1.4              |  |                                                                                       |

**Table S6. MaxEnt parameter combination ranking under 5% backward selection criterion for the modelling scenarios.**

The top 3 parameter combinations are shown for each scenario, with the best indicated by smallest AICc ( $\Delta_{AICc} = 0$ , bolded). Parameters are presented in the format of feature class combinations followed by regularization multiplier value, e.g., LQPT3.0 indicates that *Linear*, *Quadratic*, *Product*, and *Threshold* feature classes were used by MaxEnt algorithm, and the multiplier was set to 3.0. Number of variables, training AUC, testing AUC, and the difference between the two AUC values are also presented. Note the testing AUC values were averaged from 10-fold cross validation models, with standard deviation presented in brackets.

| Scenario                         | Parameters     | Variables | Training AUC | Testing AUC          | AUC difference | Delta AICc |
|----------------------------------|----------------|-----------|--------------|----------------------|----------------|------------|
| Rideau<br>+<br>NHIC-only         | <b>LQ1.0</b>   | <b>4</b>  | <b>0.933</b> | <b>0.932 (0.015)</b> | <b>0.001</b>   | <b>0</b>   |
|                                  | LQ1.5          | 5         | 0.932        | 0.931 (0.016)        | 0.001          | 2.659      |
|                                  | LQPT4.0        | 4         | 0.942        | 0.937 (0.014)        | 0.005          | 6.332      |
| Rideau<br>+<br>NHIC-<br>eDNA     | <b>LQ1.0</b>   | <b>4</b>  | <b>0.916</b> | <b>0.915 (0.019)</b> | <b>0.001</b>   | <b>0</b>   |
|                                  | LQP1.0         | 4         | 0.920        | 0.917(0.018)         | 0.003          | 5.790      |
|                                  | LQP2.5         | 6         | 0.918        | 0.916 (0.019)        | 0.003          | 13.006     |
| S. Ontario<br>+<br>NHIC-only     | <b>LQPT3.0</b> | <b>7</b>  | <b>0.967</b> | <b>0.963 (0.008)</b> | <b>0.004</b>   | <b>0</b>   |
|                                  | LQPT3.5        | 7         | 0.966        | 0.965 (0.008)        | 0.004          | 5.397      |
|                                  | LQPT4.5        | 7         | 0.966        | 0.962 (0.008)        | 0.004          | 10.563     |
| S. Ontario<br>+<br>NHIC-<br>eDNA | <b>LQPT2.5</b> | <b>7</b>  | <b>0.963</b> | <b>0.959 (0.009)</b> | <b>0.005</b>   | <b>0</b>   |
|                                  | LQPT3.5        | 7         | 0.962        | 0.958 (0.007)        | 0.005          | 0.862      |
|                                  | LQPT4.5        | 7         | 0.962        | 0.958 (0.007)        | 0.004          | 12.023     |

**Table S7. Variable contributions to optimized MaxEnt models under 1% backward selection criterion for the modelling scenarios.**

Simplified response curves are also shown (relative occurrence rate on y axis and environmental gradient on x axis). Abbreviations: Contr.: contribution to model in percentage; M.: month; Precp.: precipitation; Q.: quarter; T.: temperature.

|                         |                     | Occurrence: NHIC-only |        |                | Occurrence: NHIC-eDNA |        |                |
|-------------------------|---------------------|-----------------------|--------|----------------|-----------------------|--------|----------------|
|                         |                     | Variable              | Contr. | Response curve | Variable              | Contr. | Response curve |
| <b>Rideau</b>           | Annual mean T.      |                       | 44.5   |                | Annual mean T.        | 35.5   |                |
|                         | Total shoreline     |                       | 32.8   |                | Total shoreline       | 33.4   |                |
|                         | Waterbody%          |                       | 16.7   |                | Waterbody%            | 20.2   |                |
|                         | Forest % 5km        |                       | 6.1    |                | Mean elevation        | 10.8   |                |
| <b>Southern Ontario</b> | Annual mean T.      |                       | 22.8   |                | Total shoreline       | 25.1   |                |
|                         | Total shoreline     |                       | 22.5   |                | Mean T. warmest Q.    | 20.3   |                |
|                         | Mean elevation      |                       | 15.4   |                | Mean elevation        | 14.1   |                |
|                         | Mean T. warmest Q.  |                       | 11.6   |                | Annual mean T.        | 12.8   |                |
|                         | Waterbody%          |                       | 10.7   |                | Precp. warmest Q.     | 11.5   |                |
|                         | Precp. warmest Q.   |                       | 9.9    |                | Waterbody%            | 9.0    |                |
|                         | Total shoreline 5km |                       | 7.1    |                | Waterbody% 5km        | 7.3    |                |
